# Supplementary material for: Circulating Mature PCSK9 Level Predicts Diminished Response to Statin Therapy
Source: PubMed Central journal article supplement — J Am Heart Assoc. 2021 May 15;10(11):e019525. doi: 10.1161/JAHA.120.019525 (PMC8483520; doi:10.1161/jaha.120.019525), 2021-05-15
Supplement: JAH3-10-e019525-s001.pdf [file JAH3-10-e019525-s001.pdf]

# **SUPPLEMENTAL MATERIAL**

**Figure S1. The correlation between percent changes of PCSK9 subtypes [(a): mature PCSK9, (b): furin-cleaved PCSK9] and percent reduction of LDL-C following commencement of a statin.**

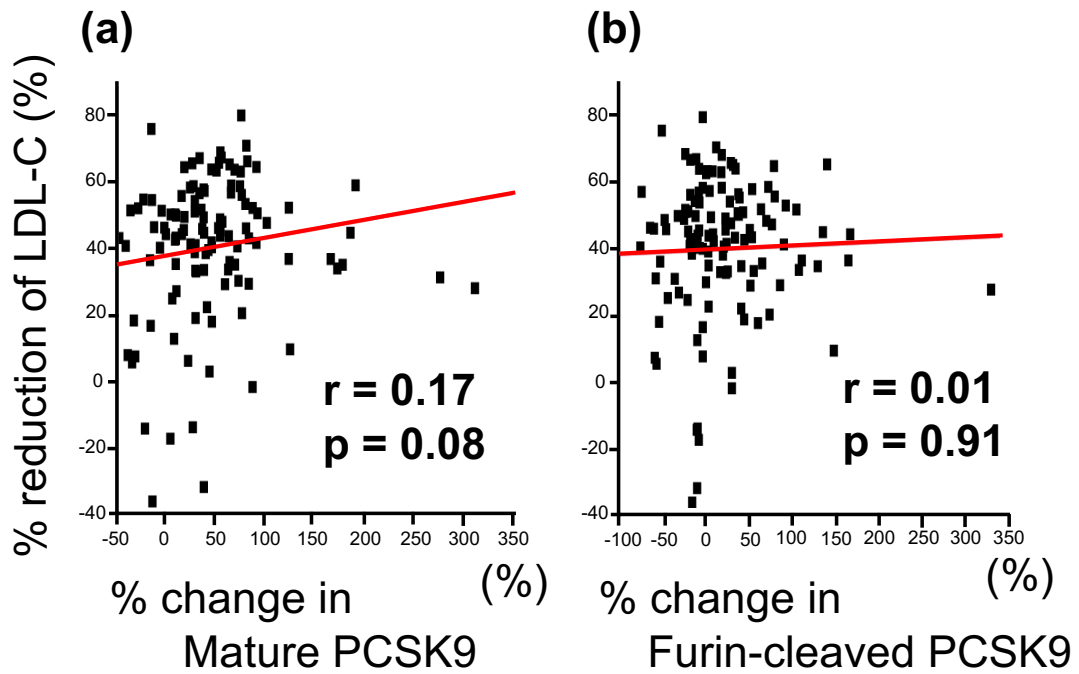

LDL-C, low-density lipoprotein cholesterol; PCSK9, proprotein convertase

subtilisin/kexin 9.
